# Supplementary material
Source: Springer Nature journal article supplement (https://www.springermedizin.de/resource/supplementary/13023_2013_597_MOESM7_ESM.pdf/9642494)

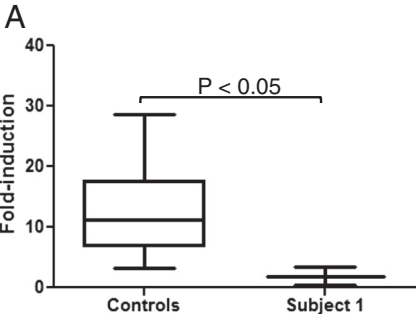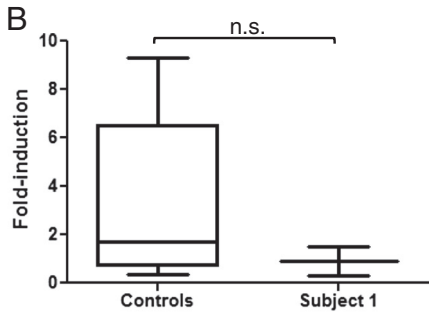

Supplement: MOESM7 [file 9642494]
